# Supplementary material
Source: bioRxiv or medRxiv preprint supplement (https://www.biorxiv.org/content/biorxiv/early/2019/08/13/732941/DC1/embed/media-1.pdf)
Supplement: Supplementary file [file media-1.pdf]

**Table S1.** Crayfish survey data and sample collection dates at each site as part of the *in-situ* validation study.

| Site | Survey 1   | No. captured<br>1 | Survey 2   | No.<br>captured 2 | No. recaptured<br>2 | Survey 3   | No. captured<br>3 | No. recaptured<br>3 | Survey 4   | No. captured<br>4 | No. recaptured<br>4 |
|------|------------|-------------------|------------|-------------------|---------------------|------------|-------------------|---------------------|------------|-------------------|---------------------|
| 1    | 26/06/2018 | 3                 | 28/06/2018 | 5                 | 0                   |            |                   |                     |            |                   |                     |
| 2    | 26/06/2018 | 9                 | 28/06/2018 | 10                | 0                   |            |                   |                     |            |                   |                     |
| 3    | 05/07/2018 | 33                | 11/07/2018 | 62                | 2                   | 31/07/2018 | 68                | 0                   | 01/08/2018 | 110               | 5                   |
| 4    | 03/07/2018 | 0                 | 21/07/2018 | 0                 | 0                   | 01/08/2018 | 0                 | 0                   |            |                   |                     |
| 5    | 04/07/2018 | 40                | 06/07/2018 | 45                | 17                  |            |                   |                     |            |                   |                     |
| 6    | 09/07/2018 | 84                | 12/07/2018 | 75                | 11                  |            |                   |                     |            |                   |                     |

**Table S2.** eDNA sampling collection dates and volume filtered at each site as part of the *in-situ* validation study.

| Site | Date       | Time  | Filtered<br>volume | Water<br>temp °C |
|------|------------|-------|--------------------|------------------|
| 1    | 22/06/2018 | 09:50 | 500ml              | 12.4             |
| 2    | 22/06/2018 | 11:05 | 1000ml             | 12.5             |
| 3    | 22/06/2018 | 15:50 | 500ml              | 14.1             |
| 4    | 22/06/2018 | 18:06 | 150ml              | 14.8             |
| 5    | 29/06/2018 | 11:40 | 1000ml             | 19               |
| 6    | 29/06/2018 | 15:00 | 250ml              | 16.7             |

**Table S3.** Table showing mismatches between the species-specific primers (WC2302) and the respective COI targeting sequence in *A. pallipes* and various other species closely related or likely to co-occur. Base pair mis-matches are highlighted in grey and matches in bases are highlighted in white.

|                                     |                   |                                |                             |                            |                     |
|-------------------------------------|-------------------|--------------------------------|-----------------------------|----------------------------|---------------------|
| Forward Primer                      |                   | GCTGGGATAGTAGGGACTTCTTT        |                             |                            |                     |
| Probe (reverse compliment)          |                   |                                |                             | GAATTAGGGCAGCCGGGCAG       |                     |
| Reverse Primer (reverse compliment) |                   |                                |                             |                            | GTAGTGGTTACCGCCCATG |
|                                     |                   | <b>1</b>                       | <b>23 43</b>                | <b>62 91</b>               | <b>109</b>          |
| <b>AB443445.1</b>                   | <b>A.pallipes</b> | <b>GCTGGGATAGTAGGGACTTCTTT</b> | <b>GAATTAGGGCAGCCGGGCAG</b> | <b>GTAGTGGTTACCGCCCATG</b> |                     |
| EU921148.1                          | P.leniusculus     | GCTGGTATAGTGGGAACCTTCTCT       | GAATTAGGTCAACCTGGAAG        | GTTGTAGTCACGGCACATG        |                     |
| GU727619.1                          | A.astacus         | GCTGGGATAGTAGGAACCTCTTT        | GAACTCGGTCAACCTGGGAG        | GTAGTAGTAACTGCTCATG        |                     |
| KP205431.1                          | F.limosus         | GCTGGCATAGTAGGAACCTCATT        | GAGTTGGGTGAGCCGGGAAG        | GTGGTAGTTACAGCTCATG        |                     |
| JQ421465.1                          | A.leptodactylus   | GCTGGAATAGTGGGAACCTCTTT        | GAACTAGGTCAACCAGGGAG        | GTCGTAGTAACTGCTCATG        |                     |
| KC499604.1                          | P.clarkii         | GCTGGTATAGTCGGAACCTCATT        | GAGTGCAGTCAACCAGGAAG        | GTGGTAGTTACAGCTCATG        |                     |
| LC228303.1                          | P.fallax          | GCTGGTATAGTAGGGACTTCATT        | GAGTTAGGTCAACCTGGTAG        | GTAGTAGTTACAGCTCATG        |                     |
| KY745779.1                          | C.quadricarinatus | TCCGGTATAGTAGGCACTTCCCT        | GAACTTGGTCAACCAGGAAG        | GTAATCGTCACAGCCCAAG        |                     |
| MF744674.1                          | F.virilis         | GCTGGGATAGTAGGGACTTCATT        | GAGTTAGGTGAGCCAGGAAG        | GTGGTAGTTACAGCTCATG        |                     |
| MH235946.1                          | P.acutus          | GCTGGGATAGTAGGGACTTCATT        | GAGTTAGGTGAGCCAGGAAG        | GTAGTAGTTACAGCTCATG        |                     |

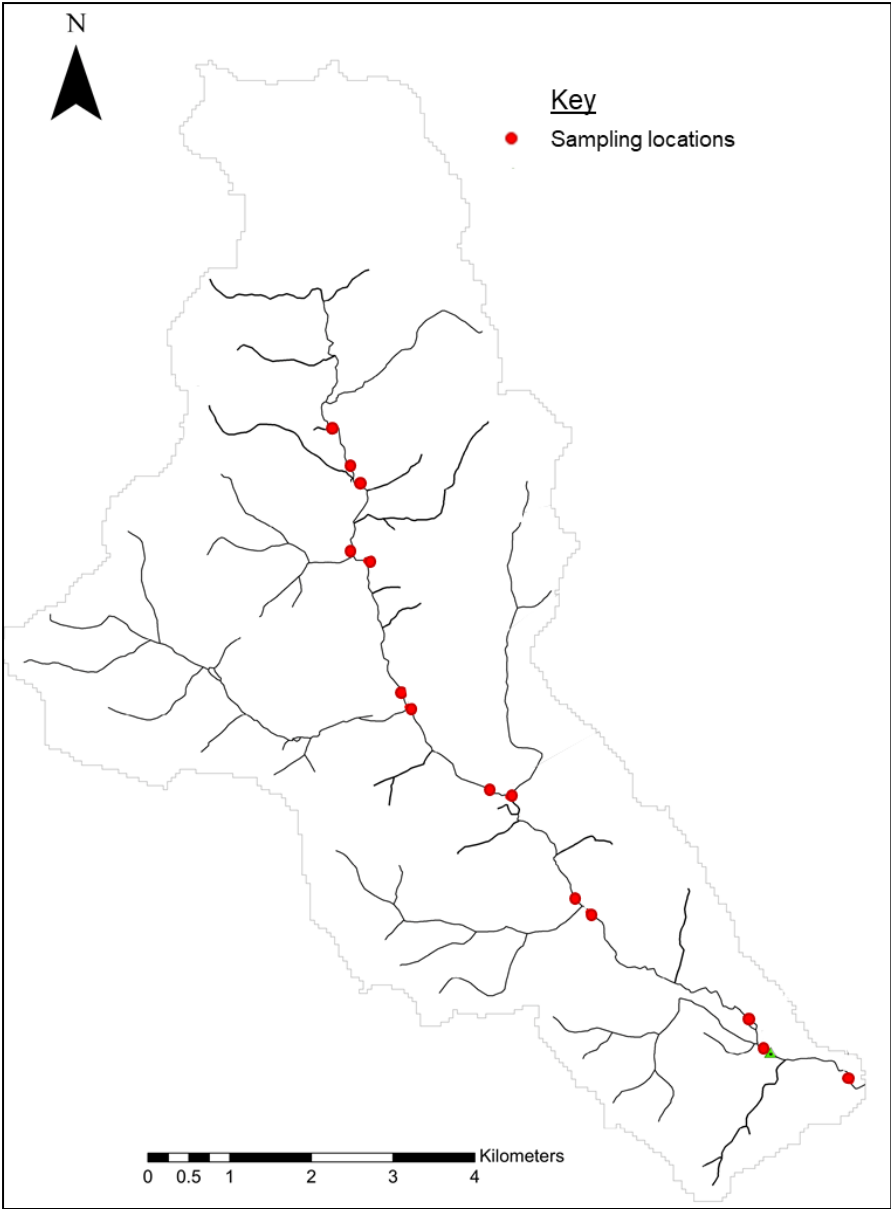

**Figure S1.** Location of sample collection sites within the Derbyshire river catchment.
